# Supplementary material for: Forecasting post-failure landslide mobility using a SPH model and data from ring shear strength tests: A case study
Source: Copernicus journal article supplement (doi:10.5194/nhess-2018-6), 2018-01-24
Supplement: Supplementary file [file nhess-2018-6-AC2-supplement.pdf]

**RC: Title: Delete “post-failure”, “data from”.**

AC: Thank you very much for the referees' comment.

The title has been modified as “*Forecasting landslide mobility using a SPH model and ring shear strength tests: A case study*”.

**RC: Please provide a plan map include topographic information of the landslides. Put all the important points, such as sampling location, the profile position shown in fig.1d.**

AC: We sincerely appreciate the referees' comment. The Figure 1 has been modified as follows.

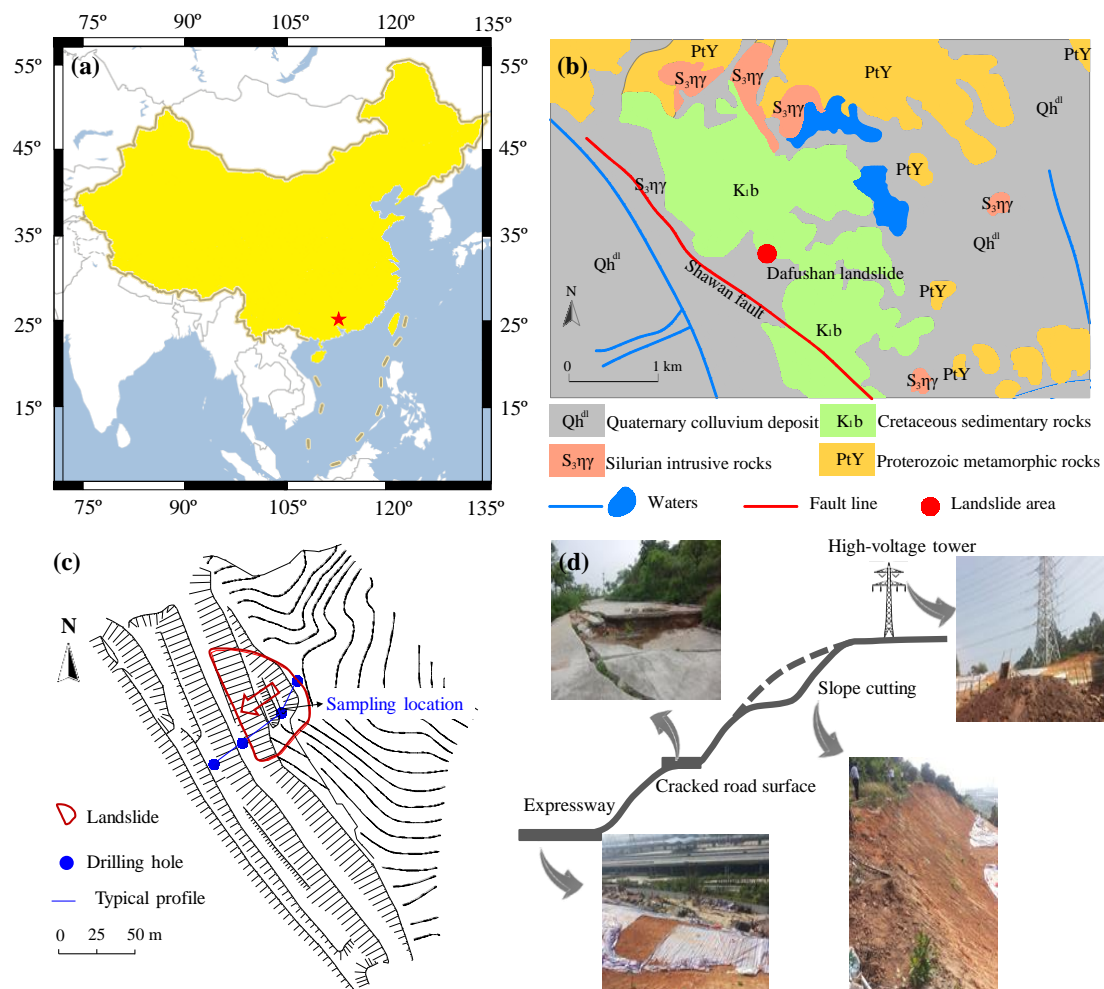

**Fig. 1.** Overview of the Dafushan landslide. (a) Landslide location; (b) Geomorphologic and geologic map of the landslide area; (c) Aerial view of the unstable slope; (d) Engineering activities on the slope (modified based on Yu et al. (2017) with permission of Springer).

**RC: Please explain how the Longitudinal geologic section be drawn without drilling hole.**

AC: Thank you very much for the referees' comment. The drilling holes has been

marked on the Fig.1 and Fig. 2, as follows. After the modified, the figures are more cleared and consistent with the text.

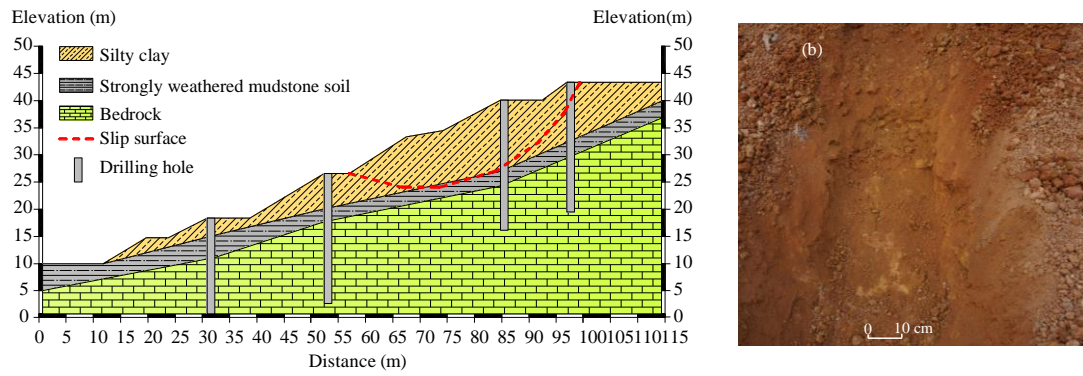

**Fig. 2.** Geology and soil at the Dafushan landslide. (a) Longitudinal geologic section of the unstable slope shown in Fig. 1(c). (b) Photograph of the silty clay landslide soil.
